# Supplementary material for: A hexa-species transcriptome atlas of mammalian embryogenesis delineates metabolic regulation across three different implantation modes
Source: PubMed Central journal article supplement (PMC9203550; doi:10.1038/s41467-022-30194-x), 2022-06-16
Supplement: 41467_2022_30194_MOESM1_ESM.pdf [file 41467_2022_30194_MOESM1_ESM.pdf]

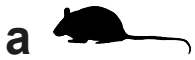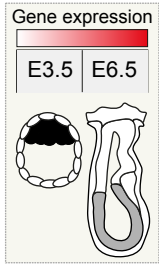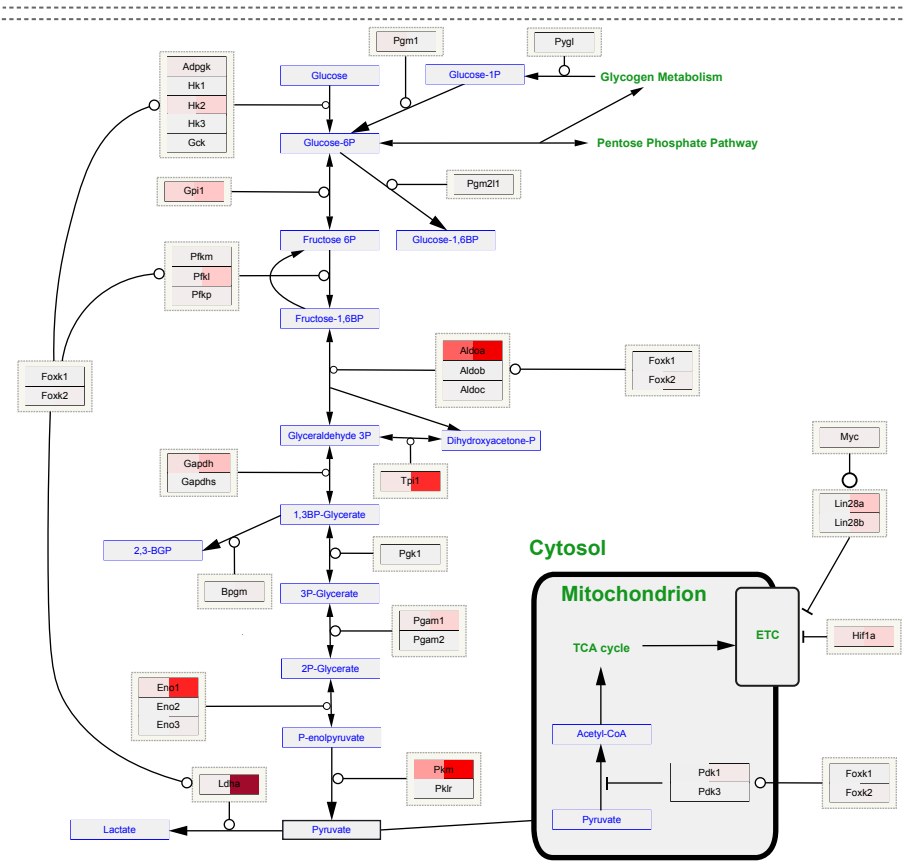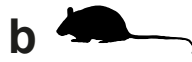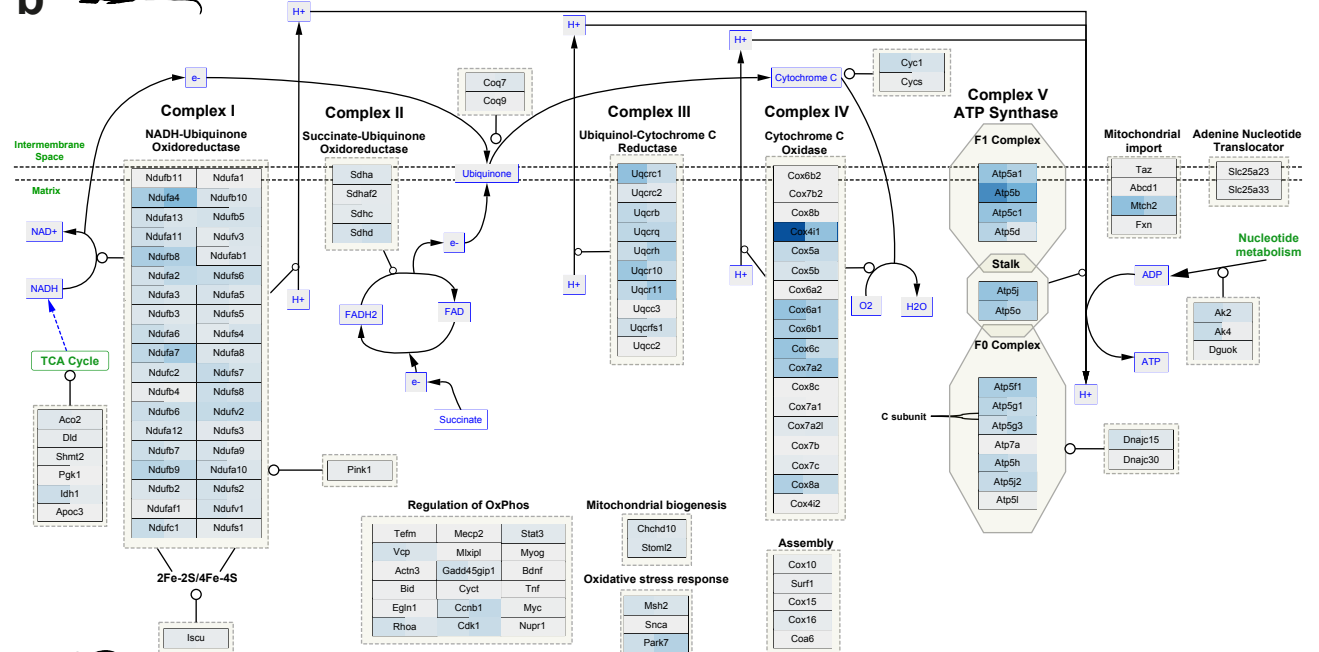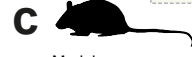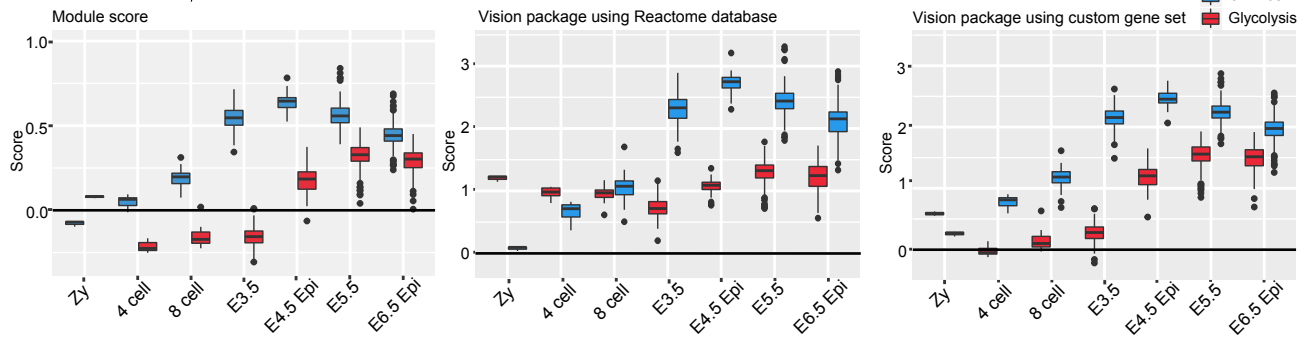

### Supplementary Figure 1

(a) Network of glycolysis-related genes used to calculate the module score for the mouse dataset. Relative gene expression in the epiblast at E3.5 and E6.5 is visualised by the colour gradient. For glycolysis the gradient from is defined by the module score range from -0.31 to 0.44 (smallest value being the lightest and largest the largest). For OxPhos the range is from 0.24 to 0.72. (b) Same as A for the OxPhos gene set. (c) Comparison of glycolysis and OxPhos scores in mouse single cell samples obtained using different methods. Left – module score with custom GO-based gene set used in the rest of this study; middle – score calculated using VISION based on the REACTOME database entry for ‘Glycolysis’ and ‘Respiratory electron transport’; right – score calculated using VISION based on the custom GO-based gene set. N numbers are reported in the legend of Figure 1e. The boxplots are defined by the 25<sup>th</sup> and 75<sup>th</sup> percentiles, with the centre as the median. The minima and maxima extend to the largest value until 1.5 of the inter-quartile range (IQR) and the smallest value at most 1.5 of IQR, respectively. E – embryonic day, ZY – zygote, 4 cell – 4 cell stage, 8 cell – 8 cell stage, cMor – compacted morula, ICM – inner cell mass, Epi – epiblast, EmDisc – embryonic disc, Tb – trophoblast, Hyp – hypoblast, VE – visceral endoderm.

**a** Yan et al., 2013; Blakeley et al., 2015; Petropoulos et al., 2016; Tyser et al., 2021

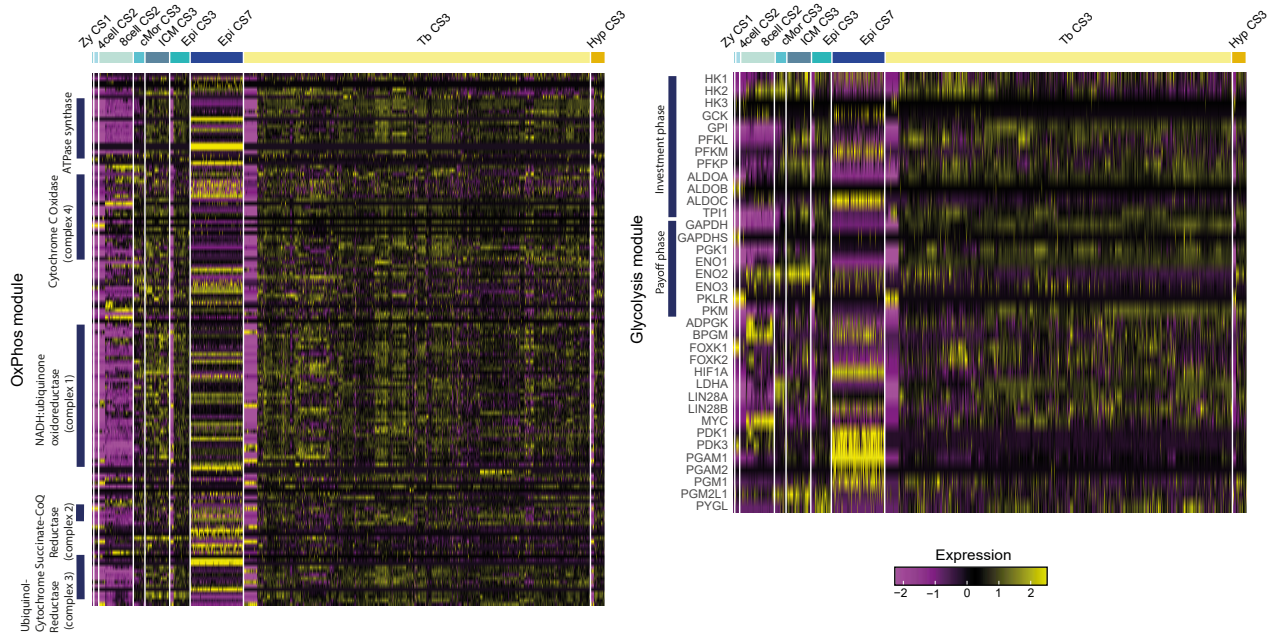

**b** Nakamura et al., 2017

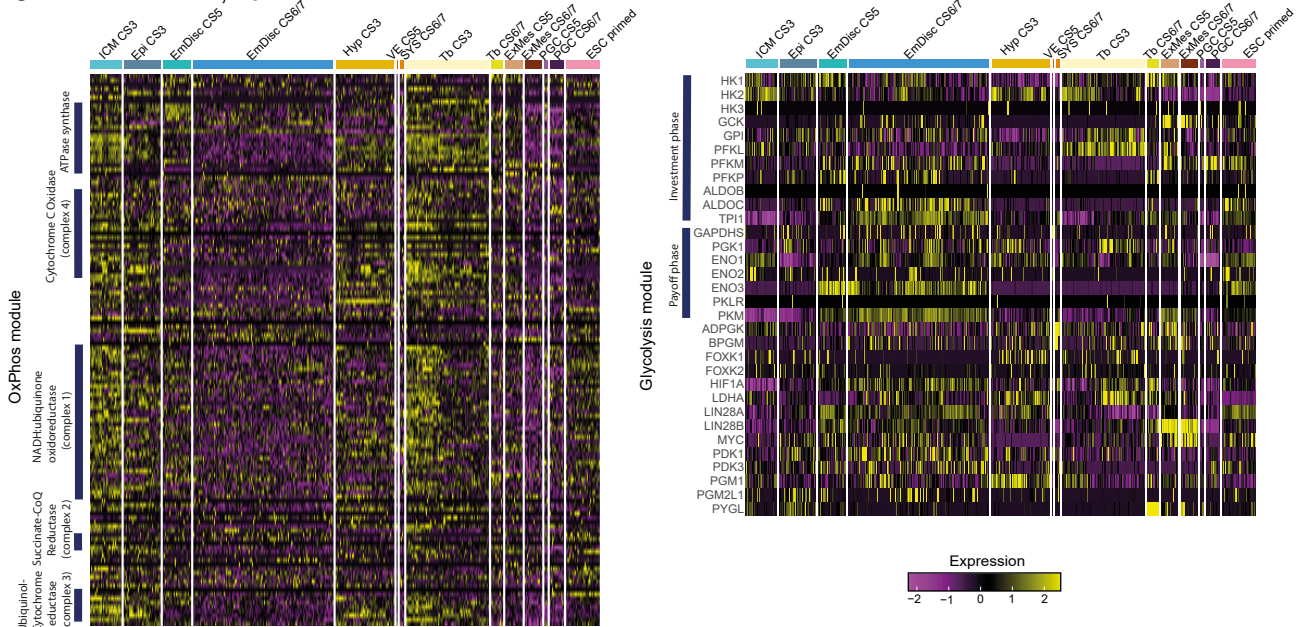

### Supplementary Figure 2

(a) Heatmaps of gene expression of glycolysis and OxPhos modules of the compiled human dataset from Fig. 2b. (b) Heatmaps of gene expression of glycolysis and OxPhos modules of the compiled cynomolgus monkey dataset from Fig. 2d. CS – Carnegie stage, ZY – zygote, 4 cell – 4 cell stage, 8 cell – 8 cell stage, cMor – compacted morula, ICM – inner cell mass, Epi – epiblast, EmDisc – Embryonic disc, ESC – embryonic stem cells, Tb – trophoblast, Hyp –hypoblast, VE – visceral endoderm, SYS – secondary yolk sac, PGC – primordial germ cells, ExM – extraembryonic mesoderm.

**a** Bergmann et al., 2022

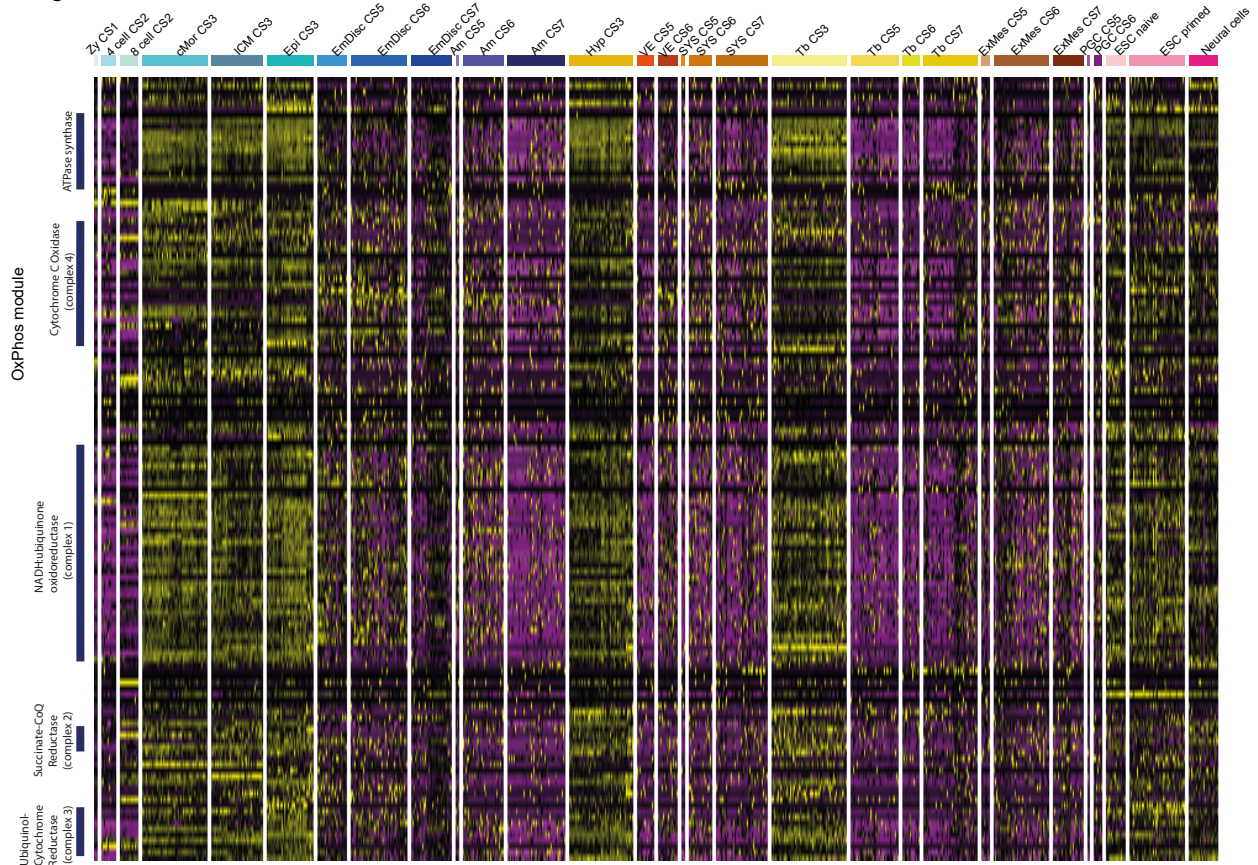

**b** Bergmann et al., 2022

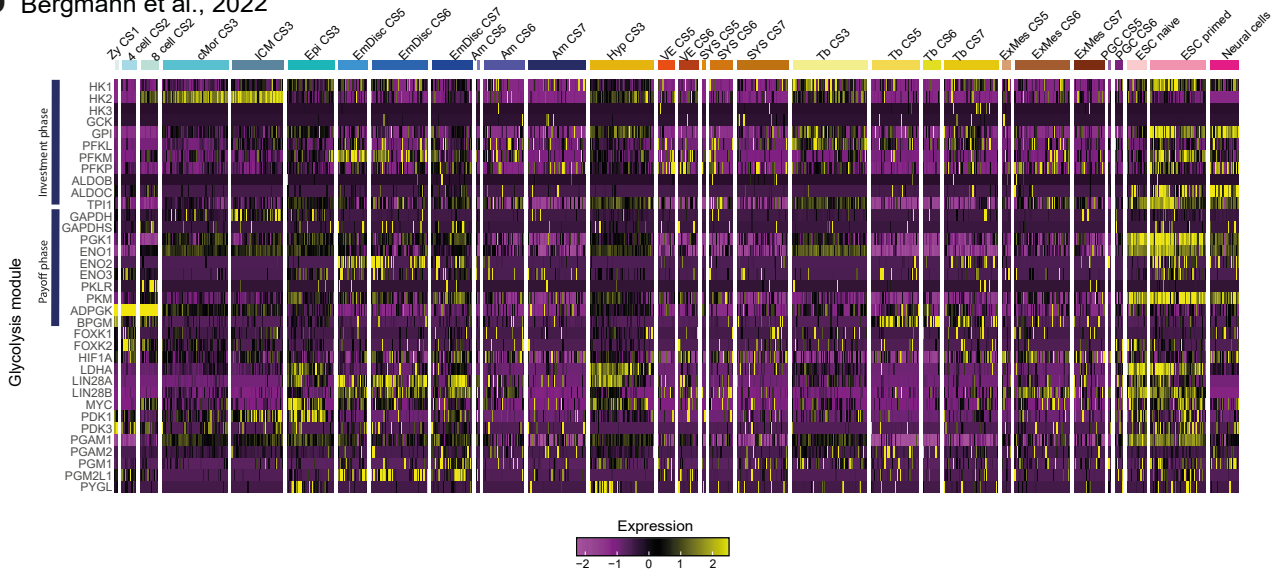

**Supplementary Figure 3**

Heatmaps of gene expression of the marmoset dataset from Fig. 2g for (a) the OxPhos module and (b) the glycolysis module. CS – Carnegie stage, ZY – zygote, 4 cell – 4 cell stage, 8 cell – 8 cell stage, cMor – compacted morula, ICM – inner cell mass, Epi – epiblast, EmDisc –Embryonic disc, ESCs – embryonic stem cells, Tb – trophoblast, Hyp – hypoblast, VE – visceral endoderm, AM - amnioid, SYS – secondary yolk sac, PGC – primordial germ cells, ExM – extraembryonic mesoderm.

**a** Ramos-Ibeas et al., 2019

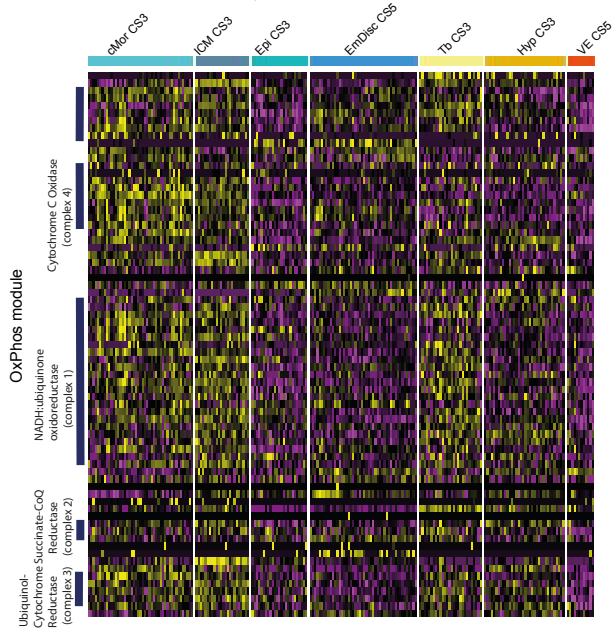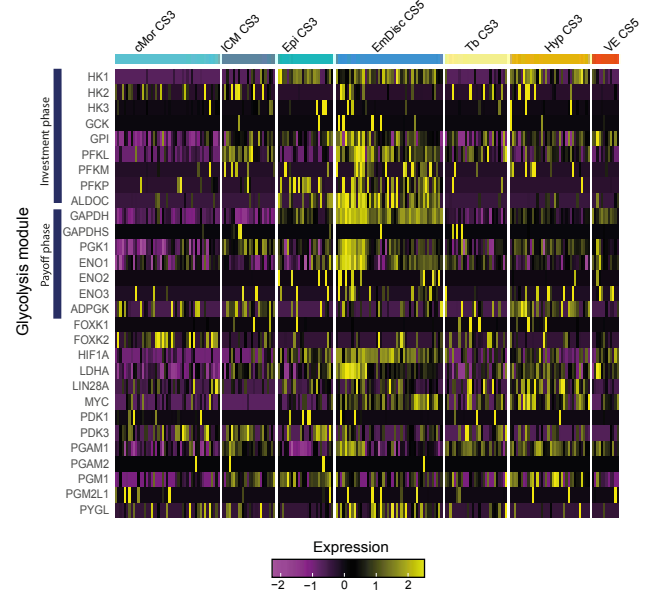

**b** Kong et al., 2019

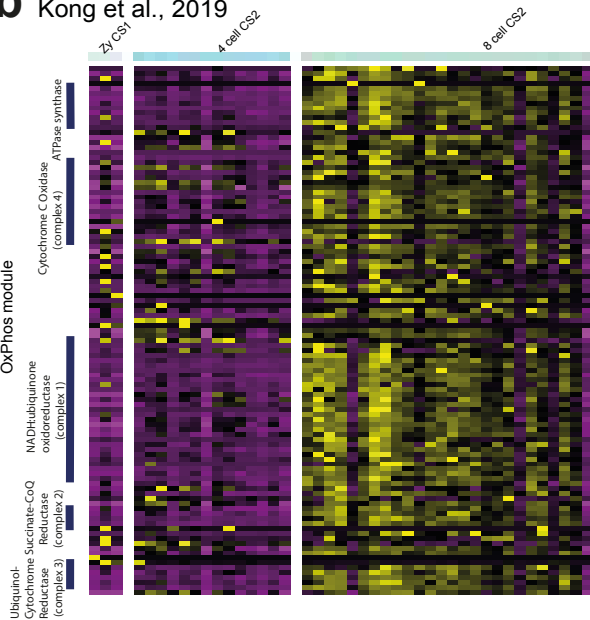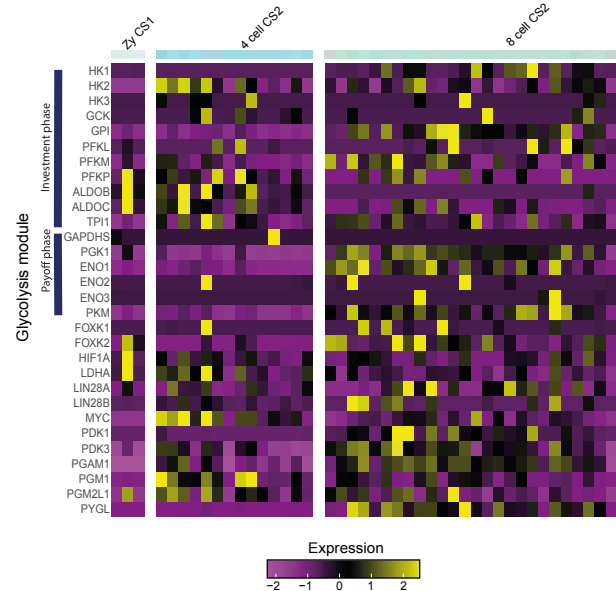

**c** Mahadevaiah et al., 2020

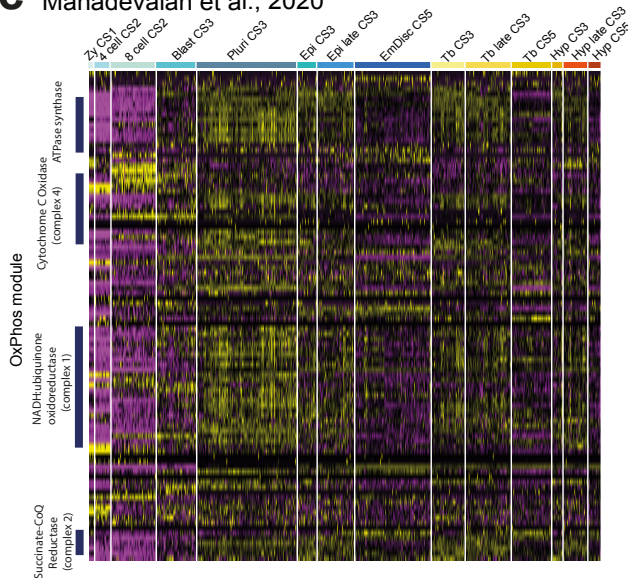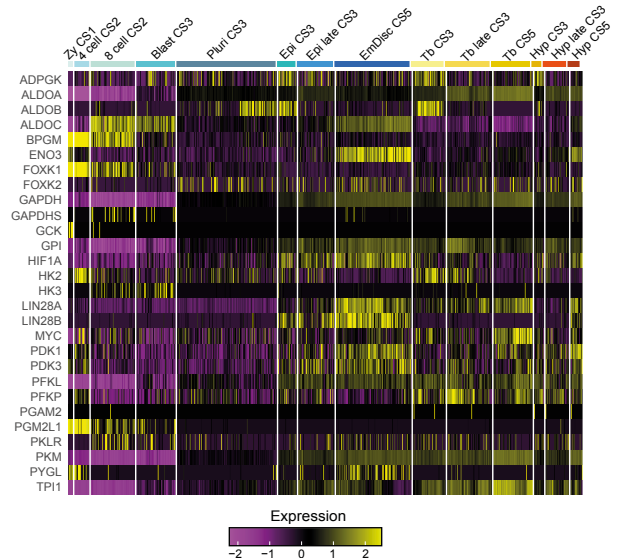

#### **Supplementary Figure 4**

(a, b) Heatmaps of gene expression of the pig datasets from Fig. 2i for the OxPhos module and the glycolysis module. (c) Heatmaps of gene expression of the opossum dataset from Fig. 2k for the OxPhos module and the glycolysis module. CS – Carnegie stage, ZY – zygote, 4 cell – 4 cell stage, 8 cell – 8 cell stage, cMor – compacted morula, ICM – inner cell mass, Epi – epiblast, EmDisc – Embryonic disc, Tb – trophoblast, Hyp – hypoblast, VE – visceral endoderm, Pluri – pluriblast, Blast – blastocyst.

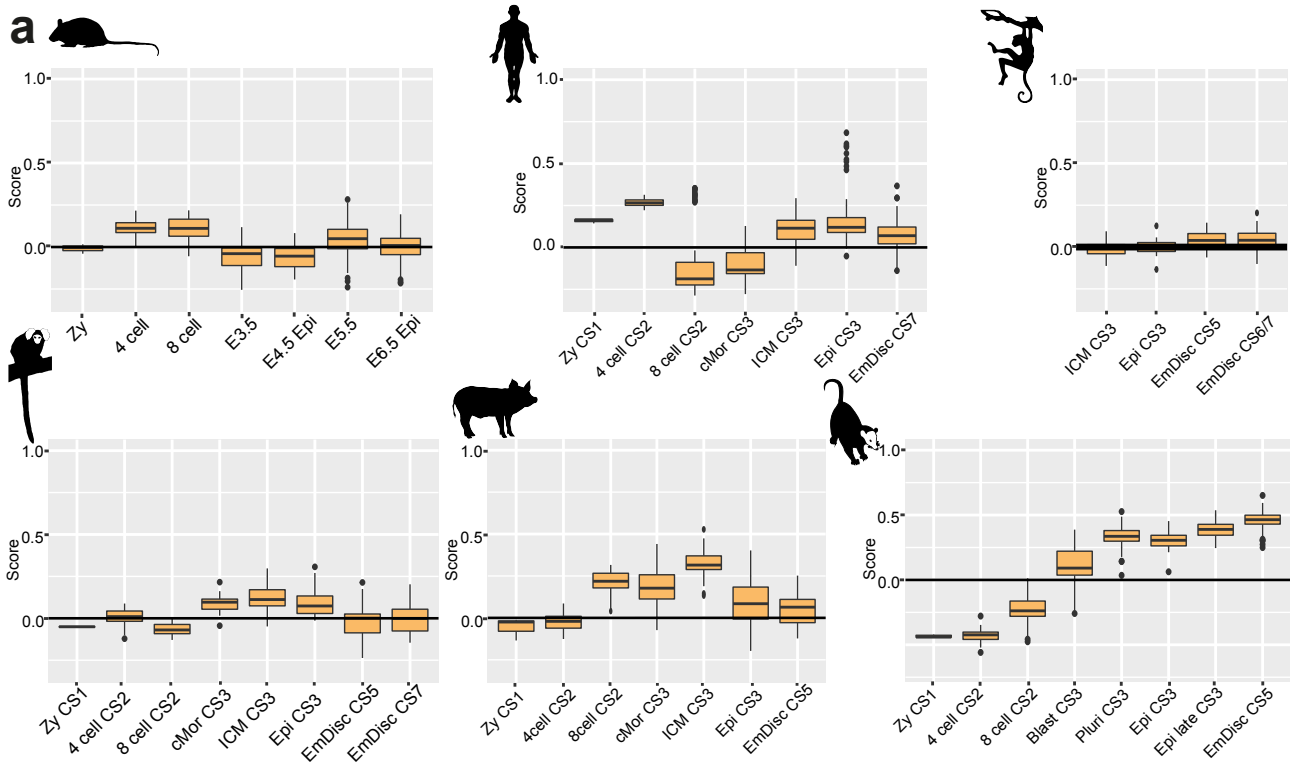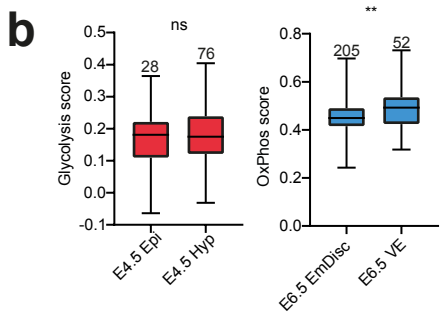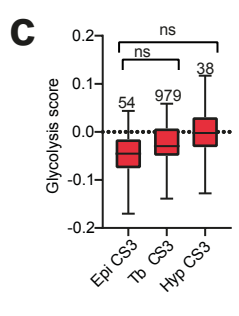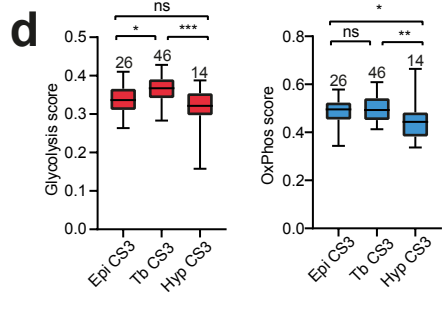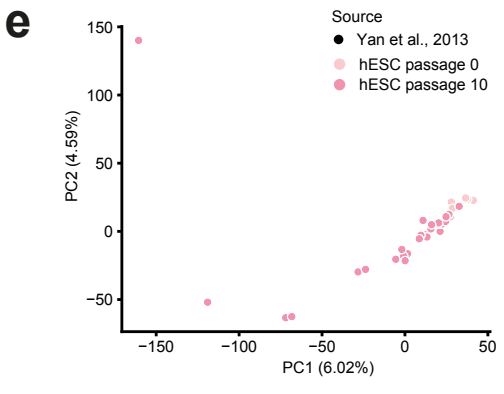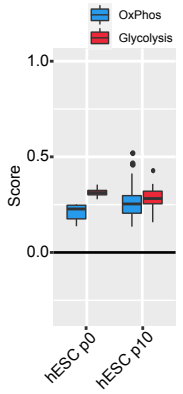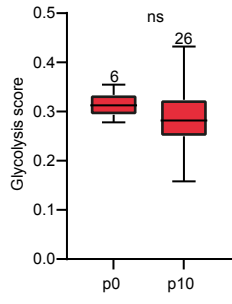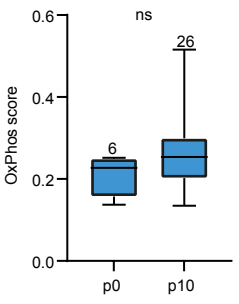

### Supplementary Figure 5

(a) Module score for pentose phosphate pathway in embryonic tissues of 6 mammalian species. The boxplots are defined by the 25<sup>th</sup> and 75<sup>th</sup> percentiles, with the centre as the median. The minima and maxima extend to the largest value until 1.5 of the inter-quartile range (IQR) and the smallest value at most 1.5 of IQR, respectively. The N numbers are presented in the legends of Figure 1e and 2c, g, e, i, k. (b) Glycolysis and OxPhos module scores for mouse samples from Figure 3A, tested using the two-sided Student's t test. The p values for glycolysis scores are as follows: E4.5 Epi vs E4.5 Hyp=0.419, for OxPhos: E6.5 EmDisc vs E6.5 VE=0.001. (c) Glycolysis module scores for human samples from Figure 3B, tested using Kruskal-Wallis test. P values are as follows: Epi CS3 vs Tb CS3=0.071, Epi CS3 vs Hyp CS3=0.798. (d) Glycolysis and OxPhos module score for opossum scores from Figure 3F, tested using one-way ANOVA. P values for glycolysis scores are as follows: Epi CS3 vs Tb CS3=0.027, Epi CS3 vs Hyp CS3=0.196, for OxPhos: Epi CS3 vs Tb CS3=0.834, Epi CS3 vs Hyp CS3=0.046. For (b), (c), (d) the boxplots are defined by the 25<sup>th</sup> and 75<sup>th</sup> percentiles, with the centre as the median. The minima and maxima refer to the largest and smallest values, respectively. (e) PCA and glycolysis and OxPhos scores for a hESC dataset<sup>50</sup>. The boxplots on the left are defined by the 25<sup>th</sup> and 75<sup>th</sup> percentiles, with the centre as the median. The minima and maxima extend to the largest value until 1.5 of the inter-quartile range (IQR) and the smallest value at most 1.5 of IQR, respectively. In the boxplots on the right the maxima and minima refer to the largest and smallest values, respectively. p0 – passage 0, p10 – passage 10. Significance tested using a two-sided unpaired Student's t-test. P values are as follows: for OxPhos=0.138, for glycolysis=0.237. All Kruskal-Wallis tests were followed by Dunn's multiple comparisons test and ANOVA's were followed by Sidak's multiple comparisons test. E – embryonic day, CS – Carnegie stage, ZY – zygote, 4 cell – 4 cell stage, 8 cell – 8 cell stage, cMor – compacted morula, ICM – inner cell mass, Epi – epiblast, EmDisc – embryonic disc, Tb – trophoblast, Hyp – hypoblast, VE – visceral endoderm.



| A Embryo samples                                |                                                               |                              |      |                                                                                                  |                          |
|-------------------------------------------------|---------------------------------------------------------------|------------------------------|------|--------------------------------------------------------------------------------------------------|--------------------------|
| Species                                         | Reference                                                     | Samples                      | N    | Conditions                                                                                       | Accession number         |
| Mouse<br><i>Mus musculus</i>                    | Mohammed et al., 2017                                         | E3.5, E4.5, E.5.5, E6.5      | 721  | <i>In vivo</i>                                                                                   | GSE100597                |
|                                                 | Deng et al., 2014                                             | Zy, 4 cell, 8 cell           | 51   | <i>In vivo</i>                                                                                   | GSE45719                 |
| Opossum<br><i>Monodelphis domestica</i>         | Mahadevaiah, et al., 2020                                     | E1.5-E7.5: Zy-CS5            | 826  | <i>In vivo</i>                                                                                   | E-MTAB-7515              |
| Pig<br><i>Sus scrofa</i>                        | Kong et al., 2019                                             | Zy, 4 cell, 8 cell           | 43   | <i>In vivo</i>                                                                                   | GSE139512                |
|                                                 | Ramos-Ibeas et al, 2019                                       | E5-E10: CS3, CS4, CS5        | 220  | <i>In vivo</i>                                                                                   | GSE112380                |
| Marmoset<br><i>Callithrix jacchus</i>           | Bergmann et al., 2022 (integrated with Boroviak et al., 2018) | CS1, CS2, CS3, CS5, CS6, CS7 | 824  | <i>In vivo</i>                                                                                   | E-MTAB-9367; E-MTAB-7078 |
| Cynomolgus monkey<br><i>Macaca fascicularis</i> | Nakamura et al., 2017                                         | CS3, CS5, CS6/7              | 443  | <i>In vitro</i> (CS3) 5% CO <sub>2</sub> % and 5% O <sub>2</sub> ;<br><i>In vivo</i> (CS5-CS6/7) | GSE74767                 |
|                                                 | Ma et al., 2019                                               | CS5, CS6, CS7                | 1453 | Embryos recovered at E3.5 and cultured <i>in vitro</i>                                           | GSE130114                |
| Human<br><i>Homo sapiens</i>                    | Yan et al., 2013                                              | Zy, 4 cell, 8 cell, CS3      | 57   | <i>In vitro</i> , 6% CO <sub>2</sub> , normoxia                                                  | GSE36552                 |
|                                                 | Blakeley et al., 2015                                         | CS3                          | 26   | <i>In vitro</i> , 5% CO <sub>2</sub> , normoxia                                                  | GSE66507                 |
|                                                 | Petropoulos et al., 2016                                      | 8 cell, CS3                  | 1190 | <i>In vitro</i>                                                                                  | E-MTAB-3929              |
|                                                 | Tyser et al., 2021                                            | CS7                          | 147  | Sample from HDBR (developed <i>in vivo</i> )                                                     | www.human-gastrula.net   |
|                                                 | Xiang et al, 2019                                             | CS3, CS4, CS5, CS6           | 547  | <i>In vitro</i> from blastocysts in 10% Matrigel; 6% CO <sub>2</sub> , normoxia                  | GSE136447                |
| B Cell culture                                  |                                                               |                              |      |                                                                                                  |                          |
| Species                                         | Reference                                                     | Samples                      | N    | Conditions                                                                                       | Accession number         |
| Mouse<br><i>Mus musculus</i>                    | Chen et al., 2016                                             | ESCs, EpiSCs                 | 447  | 5% CO <sub>2</sub>                                                                               | GSE74155                 |
| Human<br><i>Homo sapiens</i>                    | Messmer et al., 2019                                          | naive and primed hECs        | 384  | not reported                                                                                     | E-MTAB-6819              |
|                                                 | Yan et al., 2013                                              | hESCs                        | 32   | not reported                                                                                     | GSE36552                 |

**Supplementary Data 1. List of single cell RNA-seq datasets used in the study. N =**  
number of cells.
